# Supplementary material
Source: PubMed Central journal article supplement (PMC2916071)
Supplement: NIHMS189533-supplement-01.pdf [file NIHMS189533-supplement-01.pdf]

## Supplementary Table 1. Causes of mortality in GVHD patients

| <b>Cause of death, % (no.)</b> | <b>Treg <math>\geq</math>0.5% (N=30)</b> | <b>Treg &lt;0.5% (N=30)</b> |
|--------------------------------|------------------------------------------|-----------------------------|
| <b>Non-Relapse Mortality</b>   |                                          |                             |
| GVHD                           | 3% (1)                                   | 27% (8)                     |
| IPS                            | 0% (0)                                   | 3% (1)                      |
| VOD                            | 0% (0)                                   | 3% (1)                      |
| Hemorrhage                     | 3% (1)                                   | 0% (0)                      |
| Infection                      | 0% (0)                                   | 3% (1)                      |
| <b>Relapse Mortality</b>       | 20% (6)                                  | 20% (6)                     |
| <b>Total</b>                   | <b>27% (8)</b>                           | <b>57% (17)</b>             |

GVHD = acute graft versus host disease, IPS = idiopathic pneumonia syndrome, VOD = veno-occlusive disease
