# Supplementary material
Source: PubMed Central journal article supplement (PMC2916071)

# Supplementary Figure 1

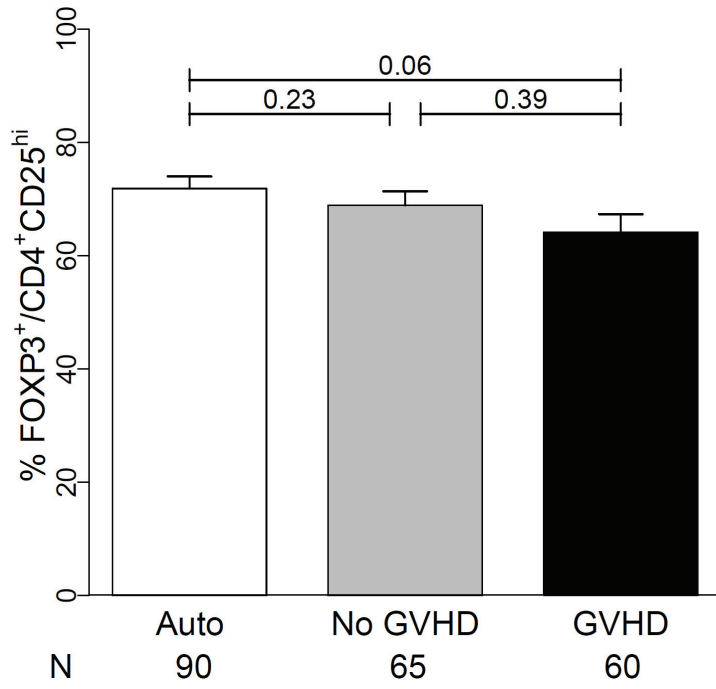

Supplement: NIHMS189533-supplement-02.pdf [file NIHMS189533-supplement-02.pdf]

# Supplementary Figure 2

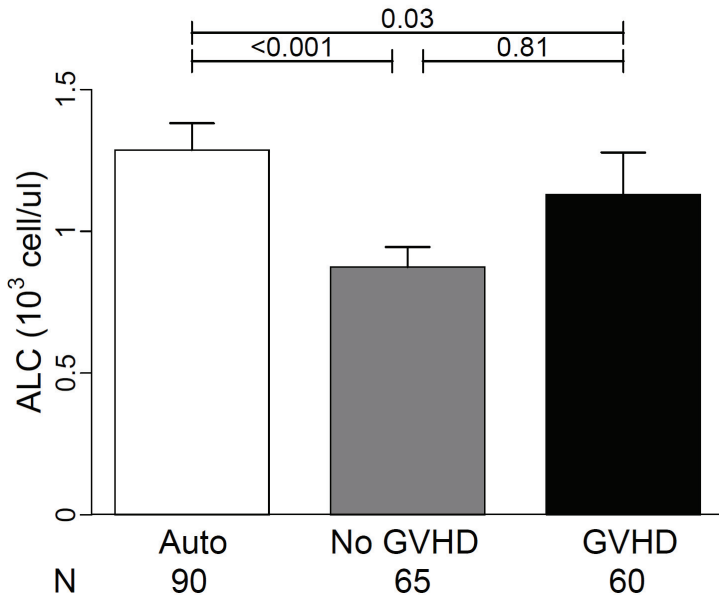

Supplement: NIHMS189533-supplement-03.pdf [file NIHMS189533-supplement-03.pdf]
